# Supplementary material for: Construction of Molecular Identification Card on basis of fluorescence SSR utilizing Proso millet Core Germplasm (Panicum miliaceum L.) origin from Qinghai
Source: Research Square preprint supplement (doi:10.21203/rs.3.rs-8600514/v1), 2026-02-16
Supplement: Supplementary file 2 [file cc688d9b7be85a4da8566e2c.xlsx]

## Sheet: Sheet1
Supplementary Table 1 The details information accession proso millets from Qinghai
Serial number	Unicode	Name	Source	Remarks
1	4162	Jidan mi	Minhe	Landraces
2	4165	Shaoshao meizi	Minhe	Landraces
3	5526	Bai jidan mi kong	Hualong	Landraces
4	5528	Hemamei	Hualong	Landraces
5	5530	Millet seed	Jianzha	Landraces
6	5531	Huang meizi	Ledu	Landraces
7	5533	Gezaomi	Minhe	Landraces
8	5534	Xiaoqingmi	Minhe	Landraces
9	5535	Honngmeizi	Huangzhong	Landraces
10	5537	Heimeizi	Minhe	Landraces
11	5538	Hongmeizi	Minhe	Landraces
12	5539	Hongmeizi	Minhe	Landraces
13	5540	Xiaojidanmi	Minhe	Landraces
14	5541	Caoqingmeizi	Minhe	Landraces
15	5542	Shaoshaomeizi	Minhe	Landraces
16	5543	Meizi	Minhe	Landraces
17	5544	Jidanmi	Minhe	Landraces
18	5545	Jidanmi	Minhe	Landraces
19	5546	Xiaoqingmi	Minhe	Landraces
20	5547	Dabami	Minhe	Landraces
21	5548	Gezaomi	Minhe	Landraces
22	5549	Gezaomi	Minhe	Landraces
23	5550	Meizi	Xiningshi	Landraces
24	5551	Meizi	Xiningshi	Landraces
25	5552	Meizi	Gonghe	Landraces
26	5553	Meizi	Gonghe	Landraces
27	5554	Meizi	Gonghe	Landraces
28	5556	Meizi	Huzhu	Landraces
29	5557	Meizi	Huzhu	Landraces
30	5558	Xiaoqingmi	Minhe	Landraces
31	5559	Jidanmi	Minhe	Landraces
32	5560	Qingmi	Minhe	Landraces
33	5561	Qingmi	Minhe	Landraces
34	5562	Baimi	Minhe	Landraces
35	5563	Baimi	Minhe	Landraces
36	5564	Qingmeizi	Minhe	Landraces
37	5565	Heimeizi	Minhe	Landraces
38	5566	Liangdami	Minhe	Landraces
39	5568	Meizi	Xunhua	Landraces
40	5569	Meizi	Xunhua	Landraces
41	5575	Xiaoqingmi	Minhe	Landraces
42	5576	Xiaohuangmi	Minhe	Landraces
43	5577	Huangmeizi	Minhe	Landraces
44	5578	Daqingmi	Minhe	Landraces
45	5579	Qingmeizi	Minhe	Landraces
46	5580	Daihaungmi	Minhe	Landraces
47	5584	Huangmi	Guide	Landraces
48	5585	Xiaohuangmi	Guinan	Landraces
49	5587	Heimeizi	Minhe	Landraces
50	7415	Huanggeda	Minhe	Landraces
51	7416	Biayingmi	Minhe	Landraces
52	7418	Baiyinghuang	Ledu	Landraces
53	7419	Baixiaomi	Ledu	Landraces
54	7421	Heiruanmi	Hualong	Landraces
55	7422	Erqingmi	Hualong	Landraces
56	7423	Hongmi	Hualong	Landraces
57	7424	Danhuangmi	Hualong	Landraces
58	7425	Lahuangmi	Hualong	Landraces
59	7426	laolaiqing	Hualong	Landraces
60	7427	Hongmi	Minhe	Landraces
61	7428	Huangkemi	Minhe	Landraces
62	7429	Hehongmi	Minhe	Landraces
63	7431	Huimeizi	Minhe	Landraces
64	7432	Huangluanmi	Minhe	Landraces
65	7433	Huangshoumi	Minhe	Landraces
66	7434	Huangyingmi黄	Minhe	Landraces
67	7435	Heiyingmi	Ledu	Landraces
68	7436	Saozhou huangmi	Ledu	Landraces
69	7437	Baipi mi	Ledu	Landraces
70	7438	Ma meizi	Ledu	Landraces
71	7439	Er qingmi	Ledu	Landraces
72	7440	Er qingmi	Ledu	Landraces
73	7441	Tuhuangmi	Ledu	Landraces
74	7442	Qinghuangm	Ledu	Landraces
75	7443	Huangyingmi	Ledu	Landraces
76	7444	Baigezidan	Ledu	Landraces
77	7445	Hehongmi	Ledu	Landraces
78	7446	Huangshoumi	Ledu	Landraces
79	7447	Qingsaozhoumi	Ledu	Landraces
80	7448	Jinhuangmi	Ledu	Landraces
81	7449	Gedahongmi	Mindou	Landraces
82	7450	Baigezidan	Minhe	Landraces
83	7451	Qingsaozhoumi	Minhe	Landraces
84	7452	Bailaomi	Minhe	Landraces
85	7453	Qingtoumi	Minhe	Landraces
86	7454	Baipimi	Minhe	Landraces
87	7456	Huimami	Minhe	Landraces
88	7457	Huanggedami	Minhe	Landraces
89	7458	Hongyingmi	Minhe	Landraces
90	7459	Huimami	Minhe	Landraces
91	7460	Huiyanmi	Pingan	Landraces
92	7461	Huanggedami	Pingan	Landraces
93	7462	Bailaomi	Pingan	Landraces
94	7463	Baipimi	Pingan	Landraces
95	7464	Zaohongmi	Pingan	Landraces
96	7465	Huimeizi	Pingan	Landraces
97	7466	Xaojinmi	Xunhua	Landraces
98	7467	Lahuangmi	Xunhua	Landraces
99	7469	Huimami	Xunhua	Landraces
100	7470	Baigezidan	Xunhua	Landraces
101	7471	Qingsaozhoumi	Xunhua	Landraces
102	7472	Danhuangmi	Xunhua	Landraces
103	7473	Huimeizi	Xunhua	Landraces
104	7474	Qingtoumi	Xunhua	Landraces
105	7475	Hebenmi	Xunhua	Landraces
106	7476	Hulimi	Huangzhong	Landraces
107	7477	Hongmi	Huangzhong	Landraces
108	7480	Baigezidan	Huangzhong	Landraces
109	7481	Hongqingmi	Huangzhong	Landraces
110	7482	Tuqingmi	Huangzhong	Landraces
111	7483	Lahuangmi	Huangzhong	Landraces
112	7484	Huanggedami	Huangzhong	Landraces
113	7485	Baipishu	Huangzhong	Landraces
114	7486	Zaohongmi	Huangzhong	Landraces
115	7487	Danhuangmi	Huangzhong	Landraces
116	7488	Qingsaozhoumi	Huangzhong	Landraces
117	7489	Heishumi	Huangzhong	Landraces
118	7490	Bailaomi	Huangzhong	Landraces
119	7492	Heizhunmi	Pingan	Landraces
120	7493	Tuqingmi	Pingan	Landraces
121	7494	Hehongmi	Pingan	Landraces
122	7495	Heimi	Pingan	Landraces
123	7496	Baigedami	Pingan	Landraces
124	7497	Huilimi	Pingan	Landraces
125	7498	Huanglimi	Pingan	Landraces
126	7499	Baigedami	Xiningshi	Landraces
127	7500	Heiguanmi	Xiningshi	Landraces
128	7501	Tuqingmi	Xiningshi	Landraces
129	7503	Hehongmi	Xiningshi	Landraces
130	7504	Bailaomi	Xiningshi	Landraces
131	7505	Lahuangmi	Xiningshi	Landraces
132	7506	Baigedami	Huzhu	Landraces
133	7507	Lahuangmi	Huzhu	Landraces
134	7508	Heiomi	Huzhu	Landraces
135	7509	Baipimi	Huzhu	Landraces
136	7510	Huilimi	Huzhu	Landraces
137	7511	Bailaomi	Huzhu	Landraces
138	7512	Qingtoumi	Jianzha	Landraces
139	7513	Jinmeizi	Jianzha	Landraces
140	7514	Dalimi	Jianzha	Landraces
141	7515	Huilimi	Jianzha	Landraces
142	7516	Jinhuangmi	Jianzha	Landraces
143	7943	A85-96	Qinghai	Landraces
144	7960	A85-113	Qinghai	Landraces
145	8113	Qing meizi	Qinghai Xining	Landraces
146	8114	Qinghei meizi	Qinghai Xining	Landraces
147	8115	Qing meizi	Qinghai Xining	Landraces
148	8116	Qinghei meizi	Qinghai Xining	Landraces
149	8117	内01-12-2-5-3	Qinghai Xining	Landraces
