# Supplementary figures and images for: Construction of Molecular Identification Card on basis of fluorescence SSR utilizing Proso millet Core Germplasm (Panicum miliaceum L.) origin from Qinghai
Source: Research Square preprint supplement (doi:10.21203/rs.3.rs-8600514/v1), 2026-02-16

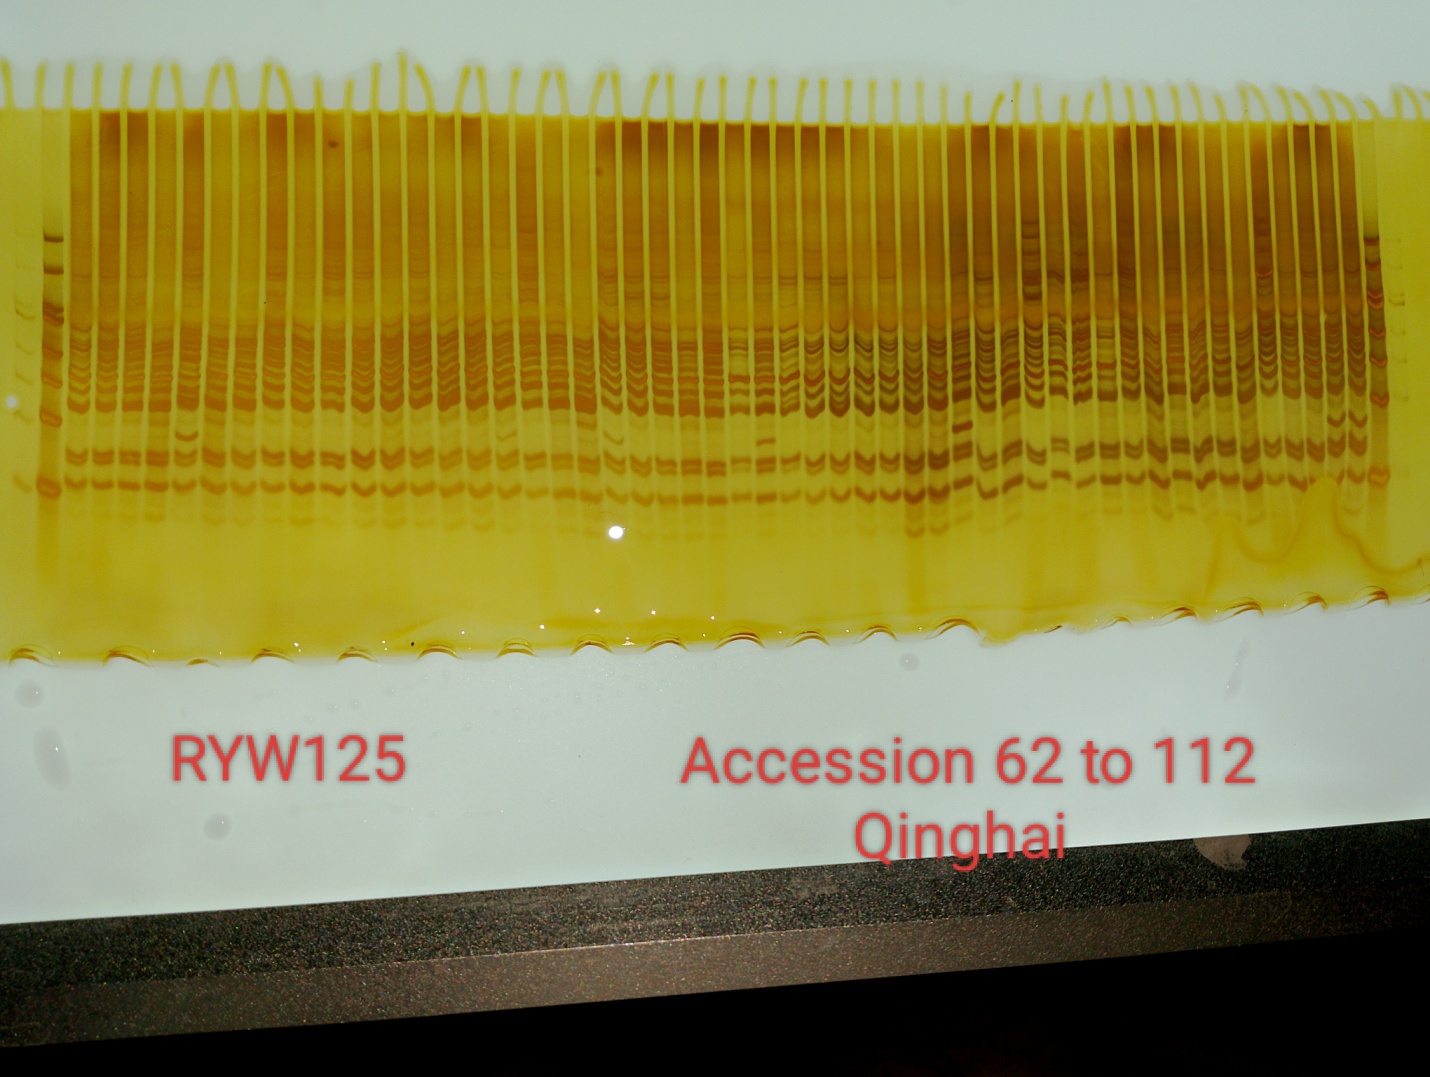


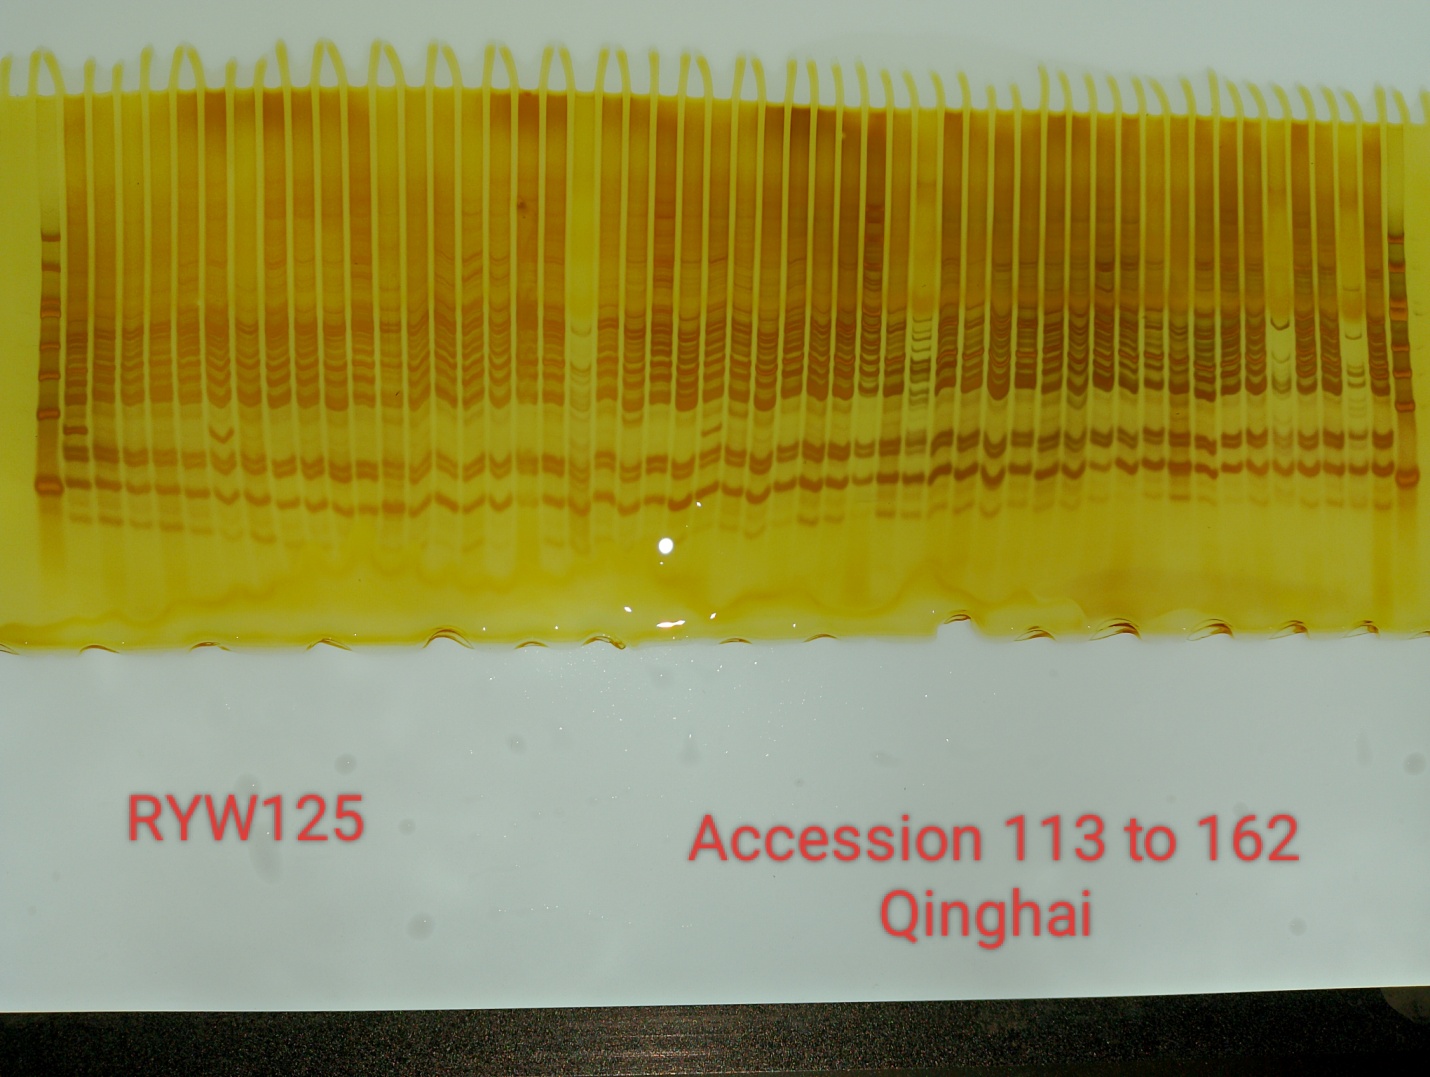


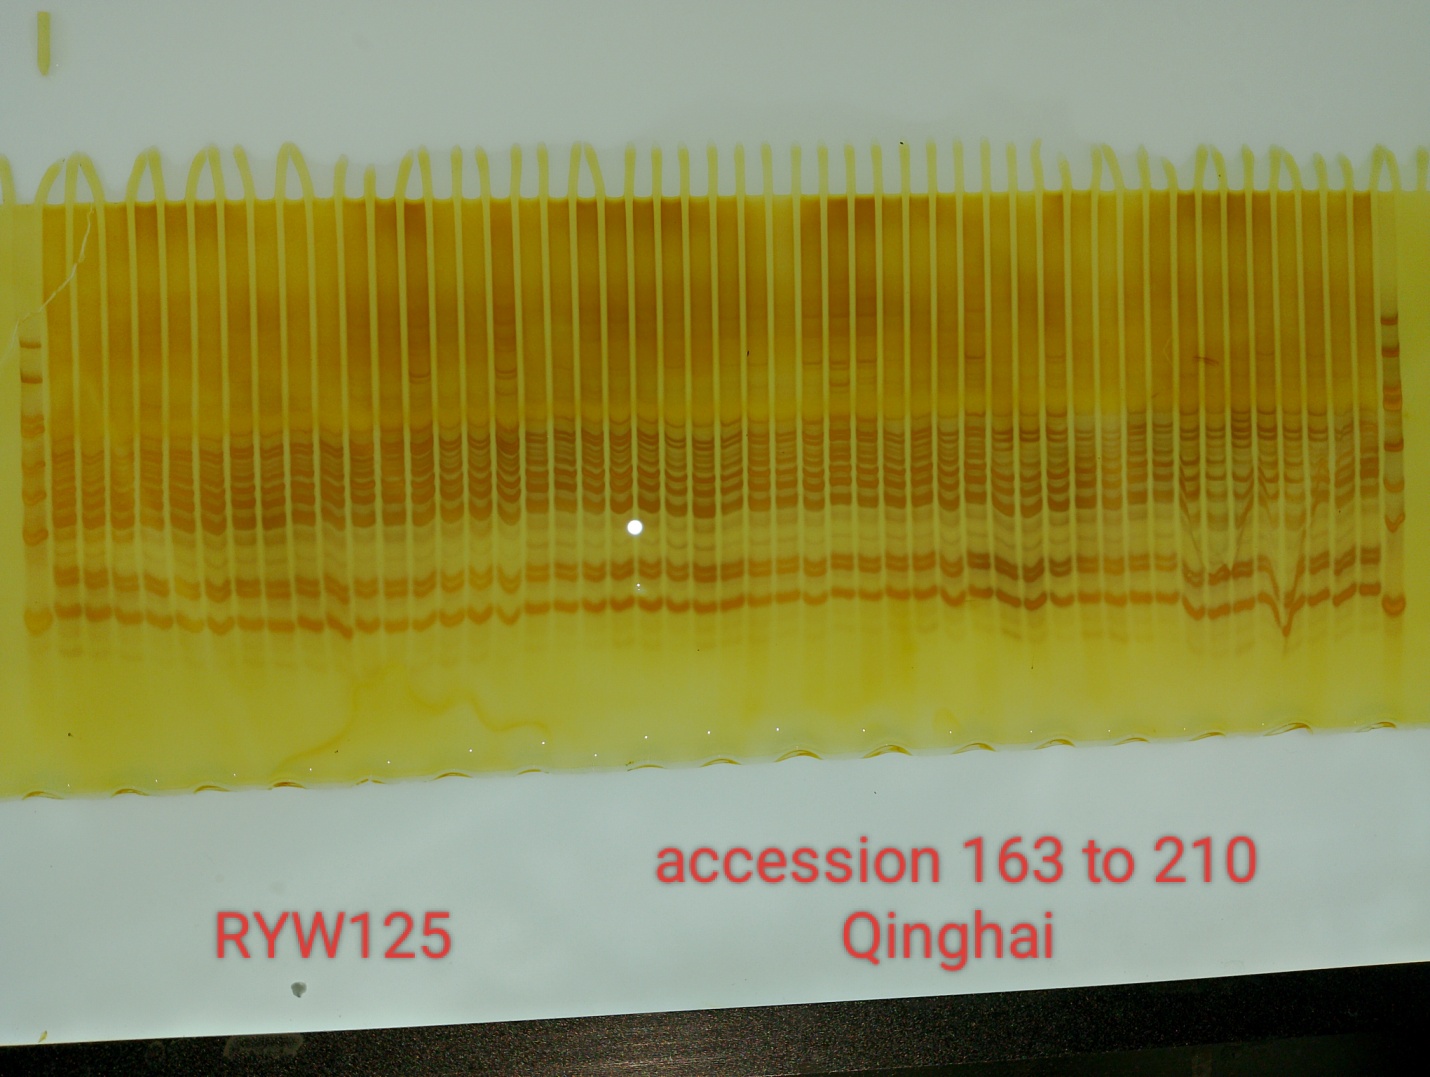


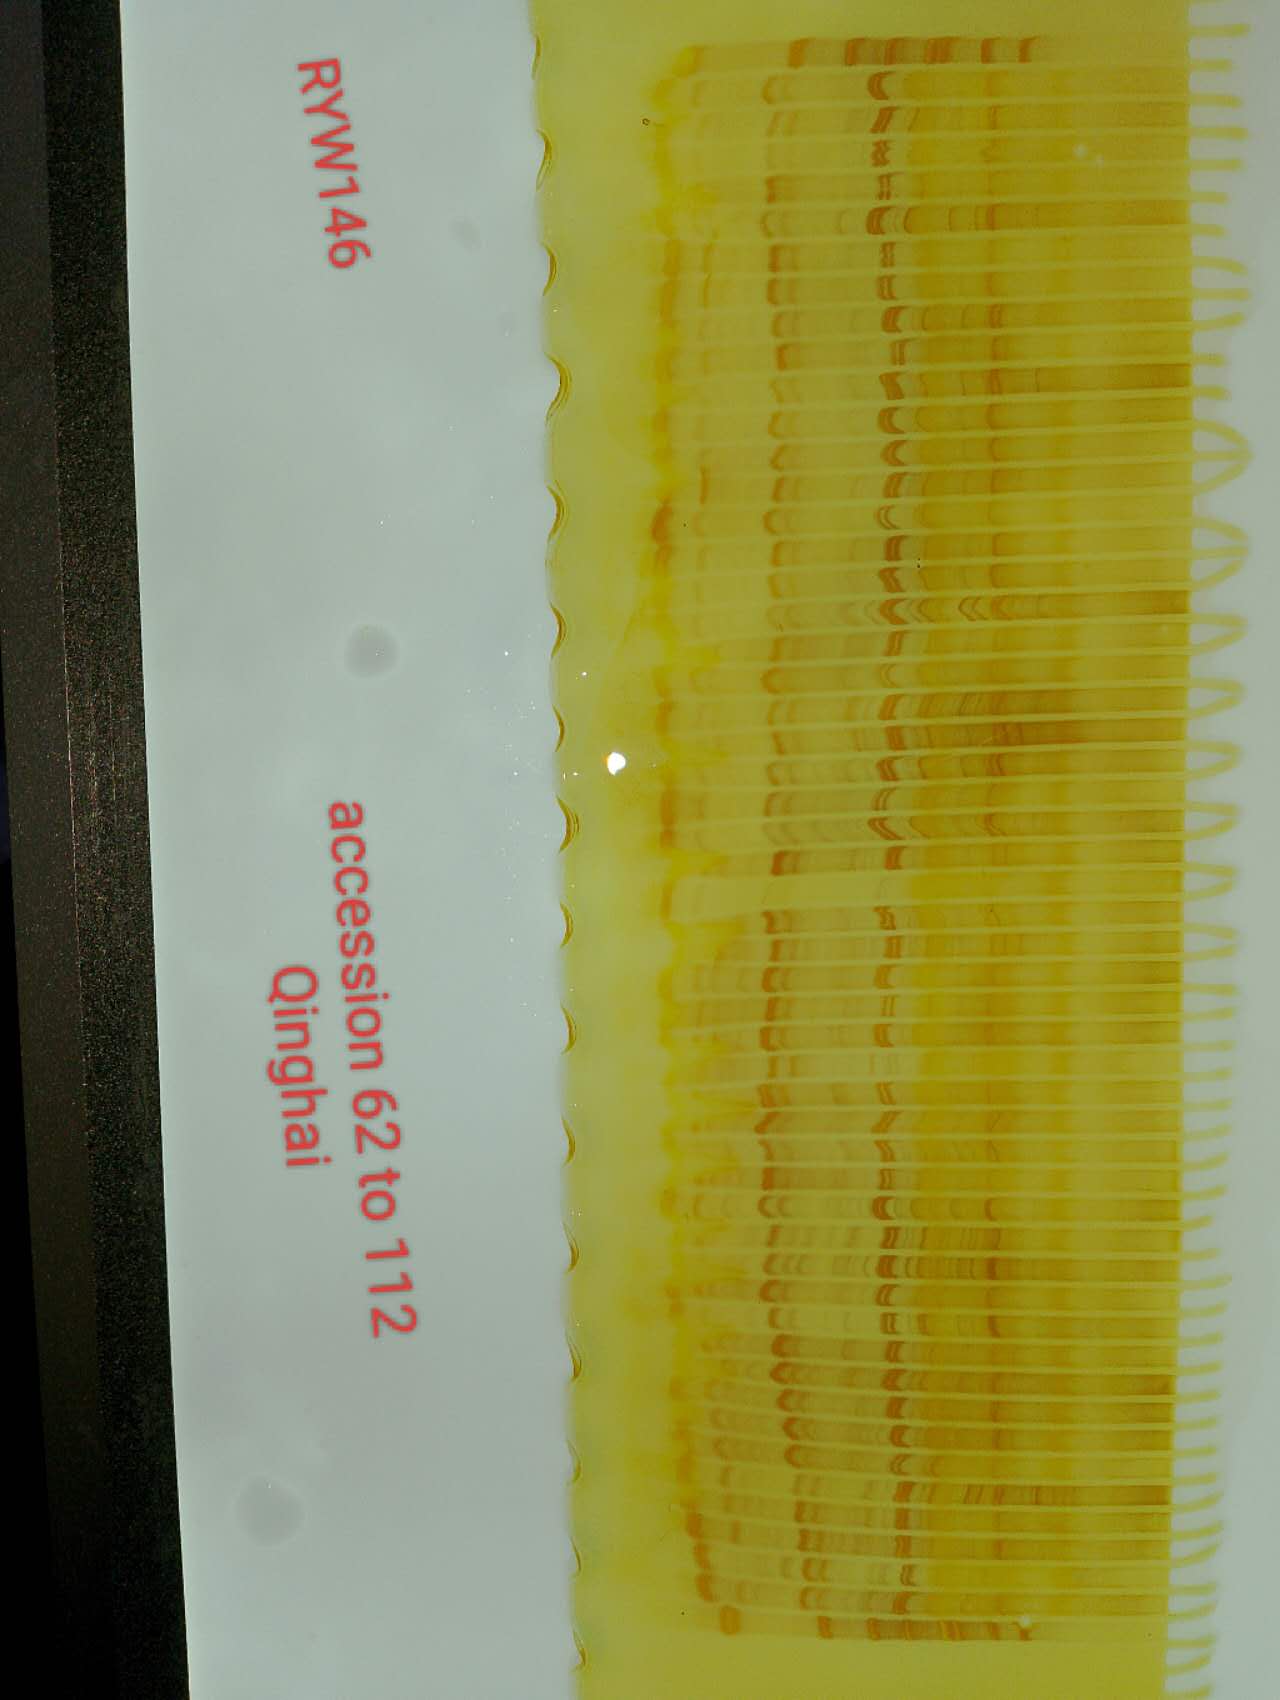


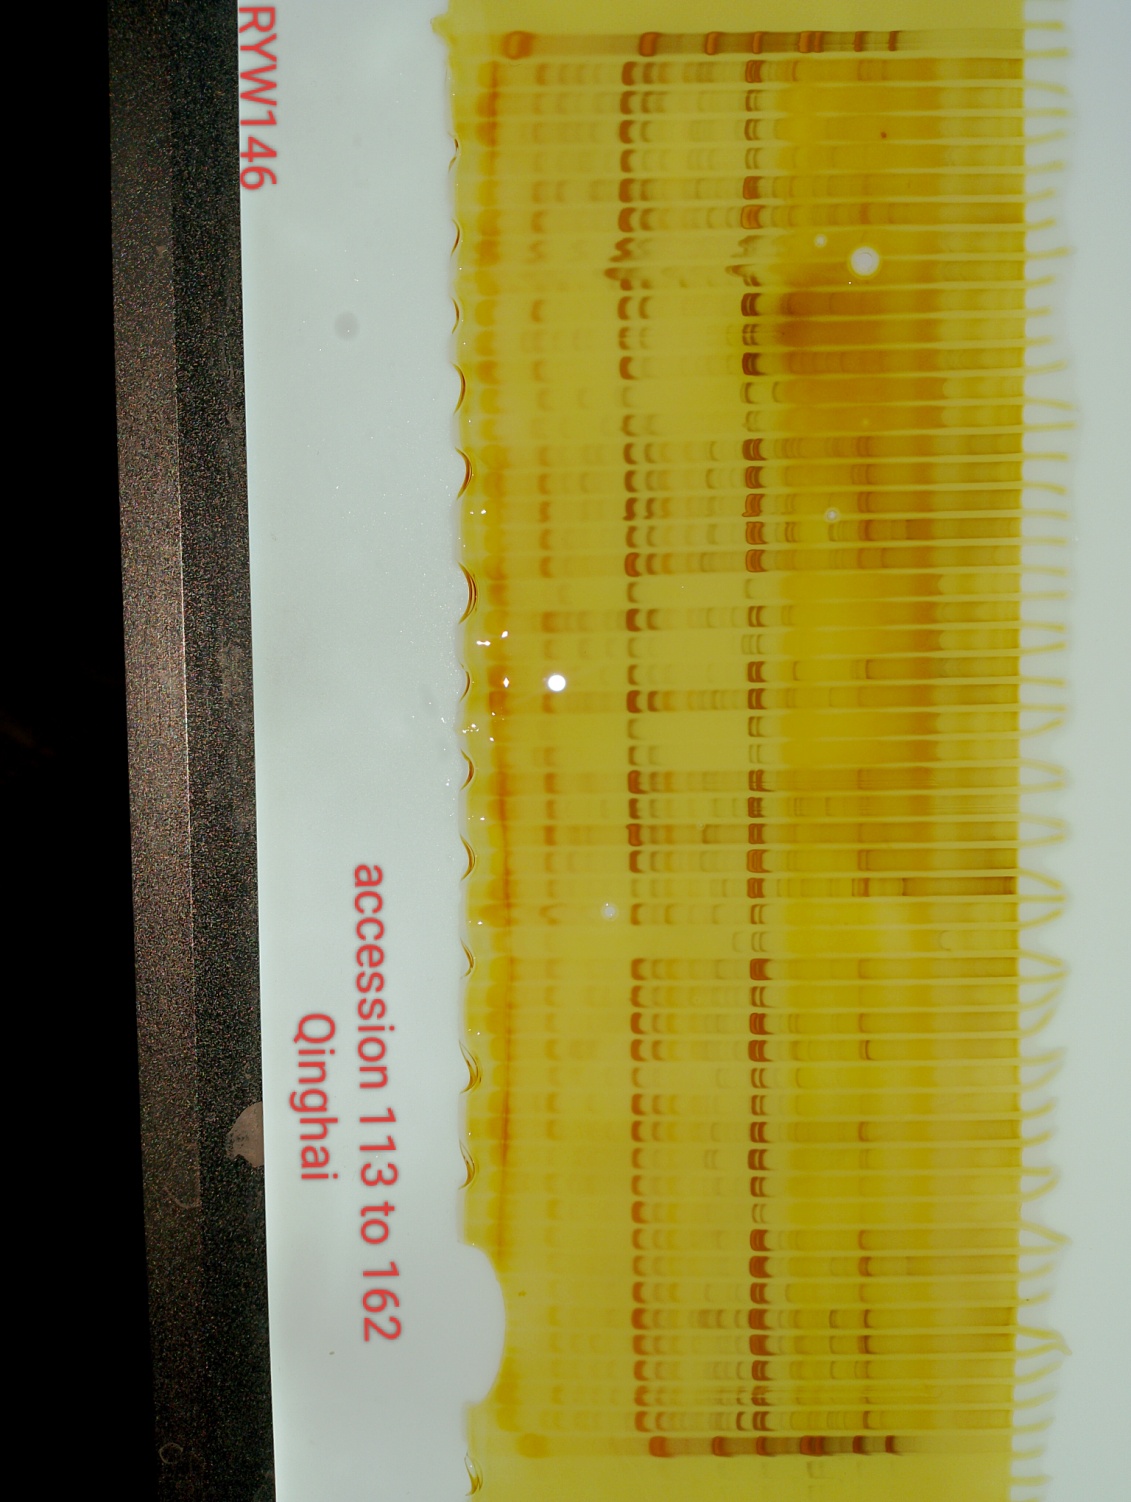

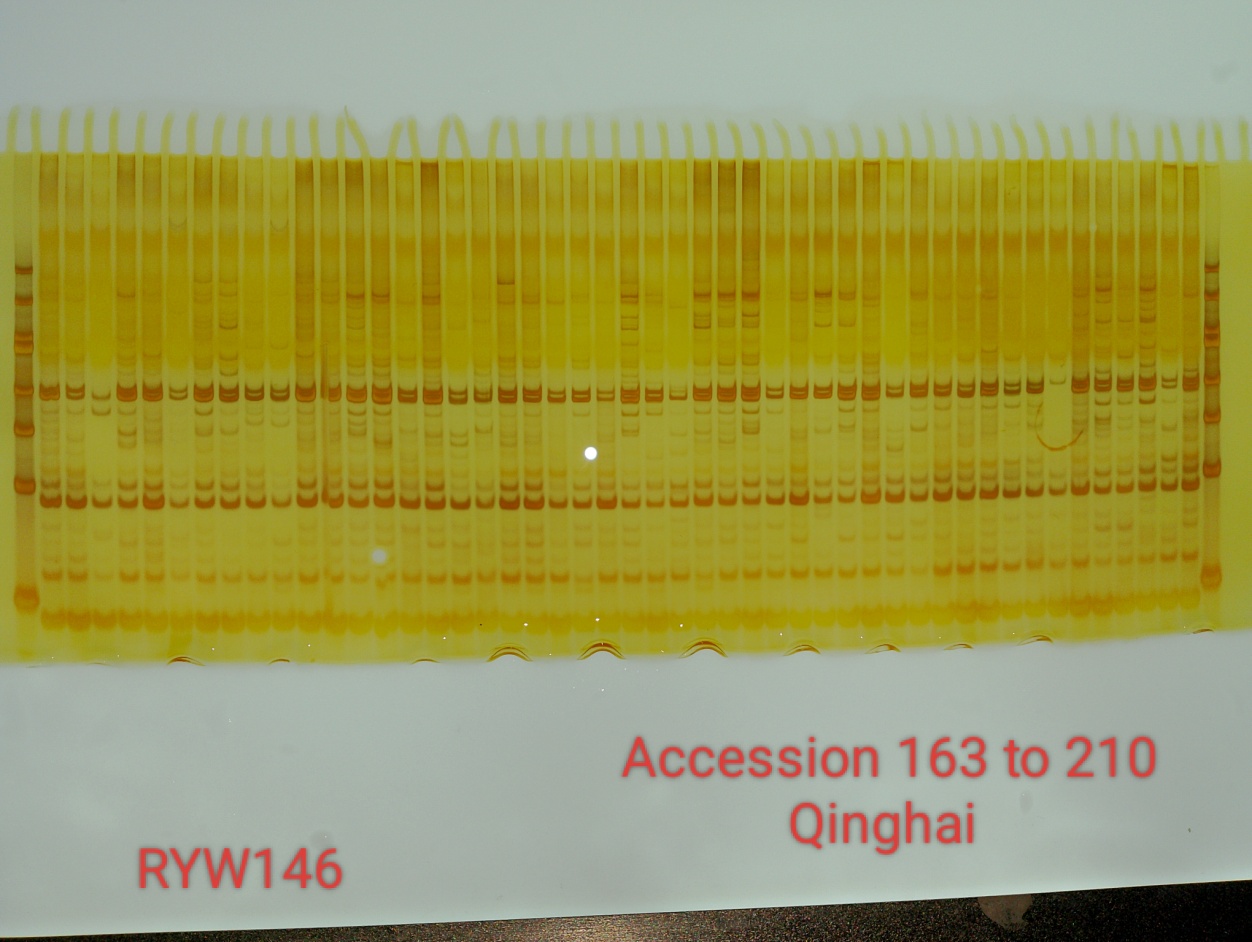

Supplement: Supplementary file 1 [file a156946e63afa67fd4e29f41.docx]
